# Supplementary material for: Hierarchical sedimentary architecture governs basin-scale solute dispersion: From pre-asymptotic dynamics to uncertainty propagation
Source: Copernicus journal article supplement (doi:10.5194/egusphere-2025-5652), 2025-11-25
Supplement: Supplementary file [file egusphere-2025-5652-AC5-supplement.pdf]

## **Response to comments from Anonymous Referee #2**

### **Overview of Anonymous Referee #2:**

This study combined borehole soil sampling, groundwater level data, and groundwater flow and transport modeling to examine the impact of subsurface heterogeneity on dispersion at the basin-scale. Overall, the dataset and modeling framework are promising, and the study has the potential to make a valuable contribution once the issues below are addressed.

**Reply:** We appreciate the reviewer's general impression on the value of our manuscript. We have updated the manuscript considering his/her valuable feedback. Below we addressed all the reviewer's comments and suggestions.

### **Major comments:**

(1) The novelty and knowledge gap can be better articulated. In particular, the current introduction may not set the stage for this study well. Consequently, the three research objectives lack literature review support and strong motivations.

- For instance, the reviewer would be curious what motivated the author to perform an uncertainty analysis. Was it because existing literature shows a wide range of different observations in the field? Was it because a new model was used and the model involved some uncertain parameters whose uncertainty is unknown? Was it because there has been an inconsistency between existing observations and models? Or something else?

- Another example is why did they want to quantify the relative contributions of sedimentary architectural attributes, hydraulic statistics, and source size? There seems to be no well-organized discussions on the existing knowledge about how these three factors control the dispersion processes under field-representative aquifers and large-scale flow fields.

- A similar question arises for the uncertain proportion part.

**Reply:** We appreciate the reviewer's request for a clearer articulation of the novelty, the knowledge gap, and the motivations behind our research objectives—particularly the uncertainty analysis and the attribution of controlling factors. The uncertainty analysis in our study is motivated by two closely related considerations: (i) basin-scale

transport remains strongly non-ergodic for long times, thus requiring quantification of how differences between realization outputs change over time; and (ii) field-representative architectural and hydraulic inputs are inherently uncertain under limited site characterization, so it is important to understand how this structural/parametric uncertainty propagates to dispersion metrics and plume predictions. Actually, a series of simulation results in this study indicate that uncertainty is not just numerical noise, but rather predictable results caused by how the plume samples heterogeneous porous media. Most importantly, our targeted uncertainty/scenario analysis is based on recent comprehensive studies. In Section 3.2, we explicitly state that a recent global sensitivity analysis (Ren et al., 2023) indicated that a small set of geologically interpretable factors, most notably facies volume proportions and in-facies mean hydraulic conductivity, exerts first-order influence on non-reactive solute dispersion across regional to basin scales. We have emphasized that our uncertainty analysis is based on these findings. Sedimentary architectural attributes, hydraulic statistics, and source size represent distinct and practically important controls on basin-scale plume evolution: (1) sedimentary architecture governs connectivity and pathway structure; (2) hydraulic statistics (especially facies-conditioned mean  $K$  and contrasts) govern velocity contrasts that drive solute dispersion; and (3) source size/geometry governs early-time sampling of heterogeneity and therefore controls the magnitude of near-source uncertainty and the onset of macrodispersion scaling. Our objective is to quantify their relative roles within one consistent, field-representative basin model so that the results can inform parameterization priorities and monitoring/management decisions. This objective already has been stated explicitly in the **Introduction**, **Results** and **Discussion** sections: lines 58-72; lines 333-340; lines 453-487. To further clarify this motivation, we have strengthened the Introduction and the opening paragraph of Section 3.2 by explicitly stating the purpose of our work.

(2) The writing and logical flow can be improved through substantial revisions.

Please see the specific comments for some examples.

**Reply:** We appreciate this comment. We have systematically revised the manuscript according to the specific comments.

(3) The manuscript involves quite a number of jargons and unclear sentences, which may require clarification or rephrasing. Below are some examples:

- “From pre-asymptotic dynamics to uncertainty propagation”
- “geometric connectivity”
- “general influence”
- “hierarchical organization”
- “Although the general influence of heterogeneity has been extensively investigated, the scale-dependent effects of hierarchical organization, particularly under basin-scale flow conditions, remain inadequately quantified.”
- “lithofacies”
- “macroform scales”
- “macro-dispersion”
- “finer-scale heterogeneity”
- “Non-ergodic”
- “basin-scale structure”
- “macroscopic spreading and dispersion across scales”
- “A total of 57 boreholes ... were collected”
- “To bias-correct parameter estimates affected by incomplete exposure of sections, ...”

**Reply:** We appreciate these detailed comments. In fact, many of the terms exemplified here are specialized in hydrogeology. Providing extensive supplementary explanations might compromise the readability of the entire text. However, based on this comment, In the revised manuscript, we have strived to reduce the use of equivocal technical terms and improve clarity in the revised manuscript.

#### **Specific comments:**

(1) What is the relationship between “finer-scale”, “micro-scale”, “meso-scale”, “macro-scale”, “macroform scales”, “large-scale”, “laboratory-scale”, “facies-scale” “field-scale”, “region-scale”, “kilometer-scale”, “basin-scale”? Without clear definitions or quantitative descriptions (like “kilometer” did), it is hard to understand the specific scales.

**Reply:** Thank you for this important comment. We agree that our manuscript used multiple “scale” descriptors, but some of which are commonly used in the literature and

were not defined quantitatively in the current version. Since this study did not conduct full-scale simulations, from the micro-scale to the macroform scale, and analyses based on one research site, we only adopted the multiscale sedimentary architecture framework to characterize the relatively coarsened and refined heterogeneity. These correspond to large-scale (Scale II) and small-scale (Scale I) measurements. Detailed scale divisions can be found in the literature by Scheibe and Freyberg (1995) and Gelhar et al. (1992). To provide quantitative anchors, we have added some explanatory statements to avoid misunderstandings as much as possible. The red content is the modified information, and the black content represents the original text (the same applies below).

Revised information is in Line 142-145 in the tracking version manuscript: Under this classification, Scale I and Scale II are used in a relative sense to denote two levels of heterogeneity representation within the same aquifer: Scale I resolves finer lithofacies variability, whereas Scale II represents a coarsened description in which Scale I facies are aggregated into composite units that preserve the dominant architectural organization.

(2) Line 30: Has the "laboratory- and sandbox-scale study" been done in this work?

If not, this argument can be misleading.

**Reply:** Thank you for this comment. Those laboratory- and sandbox-scale investigations were conducted in separate, previously published studies by our research team, using sediments and boundary conditions from the same field site. These studies are cited here to place the current watershed-scale findings within a coherent multi-scale research framework.

(3) Line 30: The reason why the current study can support studying groundwater management at data-limited regions is not trivial? Please briefly explain the reasoning herein or in the main text.

**Reply:** Thank you for this comment. Actually, our intent is not to claim that data-limited regions can be managed without any uncertainty; rather, we show how a minimal set of

measurable descriptors can be used to generate defensible uncertainty bounds on basin-scale plume metrics, which is directly relevant for management tasks such as screening-level risk assessment, monitoring-network design, and prioritization of additional characterization. As stated in the manuscript, our framework clarifies (i) which heterogeneity information must be retained for reliable regional/basin-scale transport prediction and (ii) how predictive uncertainty persists and should be accounted for. Specifically, we show that for regional-scale prediction it is sufficient to preserve “dominant geological contrasts, lithofacies proportions”, these parameters are comparatively observable or inferable from sparse boreholes/cross-sections and basic hydraulic characterization, while finer architectural details are most critical near a release source or at early transport stages. Consistent with this, we emphasize that “reliable regional forecasts require not only calibrating mean hydraulic properties but also retaining the geological contrasts and connectivity that govern transport, together with explicit recognition of scale-dependent averaging effects”. From a groundwater-management perspective, this translates into actionable guidance for data-limited settings: prioritize characterization of contrasts/connectivity proxies and facies proportions, and interpret plume forecasts through uncertainty bounds that reflect persistent non-ergodicity rather than assuming rapid convergence to a single effective dispersivity.

(4) Line 60: It is unclear how the arguments “Recent work ...” and “High-resolution ...” logically connects with each, as well as how they connect with the prior discussions. That said, it is hard to catch the key message behind these arguments.

**Reply:** Thank you for this comment. We have reorganized the Introduction section to more clearly illustrate the connections with the previous studies.

Revised information is in Line 47-69 in the tracking version manuscript: While Scheibe and Freyberg (1995) systematically introduced the concept of hierarchical organization from sedimentology into hydrogeology to characterize aquifer heterogeneity. They pointed out that aquifer heterogeneity is not a single-scale problem but rather results from the nested and superimposed geological units at different hierarchical levels (e.g.,

micro-, meso-, and macro-facies). In practice, although stochastic theories and numerical upscaling frameworks have provided valuable tools to connect flow and mixing processes across spatial and temporal domains, many studies continue to compress heterogeneity into effective parameters (Dagan, 1984; Gelhar, 1992; Dentz et al., 2011). Such simplification obscures the mechanistic role of ~~multi-scale~~multiscale sedimentary architecture in shaping flow pathways and controlling plume dynamics, and can bias spreading and mixing-relevant predictions (Fitts, 1996; Neuman and Tartakovsky, 2009; Dentz et al. 2023; Lester et al. 2016; Yin et al., 2023). ~~Scheibe and Freyberg (1995) were pioneers in systematically introducing the pre-existing concept of hierarchical organization from sedimentology into hydrogeology to characterize aquifer heterogeneity laying the foundation for subsequent multi-scale modeling frameworks.~~

To elucidate the mechanisms underlying scale dependent transport in the heterogeneous porous media, a series of Lagrangian-based models has been developed within the hierarchical-architecture framework. By characterizing the spatial organization of lithofacies across multiple scales, ~~hierarchical sedimentary architecture highlights that aquifer heterogeneity is not a single-scale problem but rather results from the nested and superimposed geological units at different hierarchical levels (e.g., micro-, meso-, and macro-facies) (Dai, 2004; Soltanian and Ritzi, 2014).~~ This ~~hierarchical framework~~these models systematically ~~integrates~~integrate the ~~multi-scale~~multiscale heterogeneities into a unified representation, quantitatively linking sedimentary attributes (such as lithofacies volume proportion, mean length, and statistics of hydraulic conductivity) to transport metrics (such as dispersion and mixing). ~~Lagrangian-based theoretical models derived from this framework~~They have been successfully ~~explain the control mechanism of scale dependent transport which is observed~~tested in laboratory and site-scale experiments (~~Soltanian~~Soltanian et al., 2015b; Dai et al., 2020; Jia et al., 2023; Ma et al., 2025).

Revised information is in Line 95-103 in the tracking version manuscript: Furthermore, as mentioned above, existing laboratory and site-scale studies have established mechanistic links between facies geometry/connectivity and solute dispersion (Dai et

al., 2005; Ramanathan et al., 2010; Soltanian et al., 2015a). Recent global sensitivity analyses further demonstrate that limited aquifer structure parameters and hydraulic conductivity statistics exert first-order control on kilometer-scale dispersion (Ren et al., 2023). These findings enable comprehensive comparisons and discussions at experimental, field, and basin scales within the same research framework, thereby constructing a complete multiscale chain to identify which hierarchical sedimentary architecture and driving factors govern macroscopic spreading and dispersion across scales.

(5) Line 65: There was no discussion on solute transport at other scales previously. It is hard to see the connection between the prior paragraph to this statement. “Most validations have been limited to laboratory or site-scale studies.” cannot be justified by the current introduction. Also, it’s unclear what point the authors would like to make.

**Reply:** This description here corresponds to the sentence in the last paragraph: They have been successfully tested in laboratory and site-scale experiments (Soltanian et al., 2015b; Dai et al., 2020; Jia et al., 2023; Ma et al., 2025).

(6) Line 70: How can “kilometer-scale” be considered as “high-resolution”? What resolution can be considered as “high”?

**Reply:** Thank you for this comment. Here “kilometer-scale” describes the spatial extent of the modeled system (or simulation domain), whereas “high-resolution” refers to the level of heterogeneity representation (i.e., whether lithofacies/hydrostratigraphy is explicitly resolved versus parameterized as effective properties). This sentence was not to imply that kilometer-scale is inherently “high-resolution,” but that recent studies conducted over kilometer- to basin-scale extents increasingly adopt finer-resolution, architecture-resolved representations compared with earlier effective-parameter models.

(7) Line 75: “late-time tails ...” This can be good motivation for this work, while the argument “Even with these advances, ...” makes the gap ambitious.

**Reply:** We appreciate this suggestion. We have retained the “late-time tails...” discussion as a key motivation, and have revised the subsequent “Even with these advances...” sentence to state a more specific and appropriately scoped gap, focusing on basin-scale, architecture-resolved settings and uncertainty propagation and avoiding overly ambitious generalizations.

Revised information is in Line 86-89 in the tracking version manuscript: Even with these advances, architecture-resolved quantification of regional/basin-scale plume evolution under field-representative heterogeneity and boundary-driven gradients remains limited, particularly regarding the persistence of asymptotic behaviour and its uncertainty.

(8) Line 80: As suggested in my first major comments, the current introduction didn't provide a comprehensive literature review and clear research trajectory to motivate the objectives.

**Reply:** Thank you for this comment. We have strengthened the **Introduction** section to illustrate the connections with the previous studies and to state the purpose of our work clearly.

(9) “Part II the” is missing a verb.

**Reply:** Thank you for this comment. Revised information is in Line 103 in the tracking version manuscript: Section 2 introduces the geographic background of the study area, borehole data, and sedimentary architecture analysis methods;

(10) Section 2 - Method: Each subsection of the method section includes both methodology (i.e., general approach) and specific model setup (i.e., parameters and data), which sometimes can affect readability. I would suggest separating them into a methodology section and a parameterization (or data collection and model setup) section. I believe this reorganization will substantially improve the clarity and quality of the paper.



**Reply:** Thank you for this comment. We attempted this adjustment and found that the logical flow of the text would create new confusion. Because this study inevitably requires providing information on lithofacies classification and its related parameters before proceeding to the water flow and solute transport models. Presenting the text in a conventional modular format of modeling and parameters would be even more confusing, so we maintained the current structure.

(11) Line 90: “The Nen River defines ...” Why is this matter? “The regional terrain is gently ...” Is there any support from literature or the collected data? if so, I would either cite the references or clarify the data support.

**Reply:** Thank you for this comment. The Nen River is generalized as the boundary of the study area, which determines the simulation domain of the model. Regarding the claim of gentle terrain, we derive this information from topographic contour lines, and the regional geological survey report also concludes this. Since a valid citation format cannot be provided, this paper only provides a brief overview.

(12) Figure 1 caption: More details should be provided about the selections of boreholes and cross-sections, as well as the rational or purposes of such decisions. Additionally, what were the cross-sections used for? Or what kind of information was collected from the cross-sections?

**Reply:** We simply collected as much borehole information as possible within the area and applied it to the modeling work; no special selection was performed. The purpose of using the cross-sections and the processing results is described in detail in Section 2.2.1.

(13) Figure 2: The figure is hard to interpret without providing more details about the meanings of the acronyms and the plotted regions. In the right figures, how can one interpret the figure? Are they referring to the horizontal or vertical view of the aquifer, or something else? How are the right figures connected to Figure 1b.

**Reply:** Thank you for this comment. Since this study defines multiple lithofacies names at two scales, it would be extremely redundant to introduce them all again in the figure title. The definitions of the abbreviations are already detailed in section 2.2.1. The figure on the right side is a schematic diagram of an actual lithofacies structure, demonstrating how lithofacies at a small scale are merged into lithofacies at a large scale. It can be a vertical or a horizontal view, both of which are possible in reality. The figures on the right have no relation to Figure 1b.

(14) Line 130: Can you elaborate what does it mean by "parameterized by lithofacies volume proportions and mean lengths." or provide a brief introduction about the parameterization?

**Reply:** This study used geostatistical methods based on Markov chains to construct heterogeneous lithofacies models, and the most important modeling parameters are lithofacies volume proportions and mean length, which are the information introduced in the latter half of this paragraph and the next paragraph.

Revised information is in Line 160-161 in the tracking version manuscript: The lithofacies volume proportions ( $P$ ) define the stationary occurrence probabilities of each lithofacies, while the directional mean lengths ( $L_X$ ,  $L_Y$ ,  $L_Z$ ) quantify facies correlation scales along the principal directions.

(15) Line 130: What is the "bias-correct parameter? What does it mean by "To bias-correct parameter estimates affected by incomplete exposure of sections,"?

**Reply:** Partially exposed sections can lead to errors in the statistical calculation of the actual mean length of lithofacies. For example, the mean length is calculated by dividing the sum of consecutive lengths by the number of occurrences. Because of partial exposure, the total length may be underestimated.

(16) Line 135: How were  $P_S$  and  $P_D$  defined?

**Reply:** Thank you for this comment. We have added a definition of volume ratio in line 160 in the tracking version manuscript: “The lithofacies volume proportions ( $P$ ) define the stationary occurrence probabilities of each lithofacies...”. Also, we have added a schematic figure in the Supplementary materials (Figure S17) to demonstrate the physical meaning of volume proportions.

(17) Table 1: It is hard to understand the physical meanings of the parameters and how they were derived. I would suggest providing a schematic or conceptual plot and label them in the plot at least for some of them (e.g.,  $L_x$ ,  $L_y$ ,  $L_z$ ), while providing the formula to compute  $P$ .

**Reply:** Thank you for this comment. We have added a schematic figure in the Supplementary materials (Figure S17) to illustrate how to calculate the mean length and volume proportions.

(18) Line 155: I guess you were referring to the characteristic diameters of the grains. Please clarify. What is USBR?

**Reply:** Thank you for this comment. we indeed refer to characteristic diameters of the grain and have changed the expression in the line 193 in the tracking version manuscript: the  $d_e$  is the particle **diameter corresponding to  $e\%$  finer** on the cumulative **grain-size** distribution curve. USBR refers to the U.S. Bureau of Reclamation grain-size based empirical approach for estimating saturated hydraulic conductivity  $K$  from characteristic diameters (e.g.,  $d_{10}$ ) and related gradation descriptors. This is a widely used abbreviation definition.

(19) Table 2: The unit should be  $\ln(m/d)$ . Is  $\sigma$  dimensionless? If not, the unit should be provided.

**Reply:** Thank you for this comment. Using  $(m/d)$  as the unit indicates that only the value of  $K$  has been logarithmically transformed, so the unit remains unchanged. Currently, many researches in the field of groundwater treated the variance of  $\ln K$  as dimensionless.

(20) Line 175: The authors are recommended to justify that 50 realizations are statistically grounded by adding relevant references.

**Reply:** Thank you for this comment. We have added a sentence in line 215 in the tracking version manuscript: “This number of realizations is sufficient to obtain stable ensemble statistics (Zhou et al., 2018; Henri et al., 2020)”.

(21) Figure 3 provides a more clear explanation of part of the methodology. Based on that, I would suggest using some plots (e.g., a and c) to create a conceptual figure to describe the entire methodology and adding a short subsection to introduce the conceptualization at the very beginning of Section 2 Method. This will make the rest easier to follow.

**Reply:** Thank you for this comment. We have added the corresponding content based on the aforementioned suggestions.

(22) Figure 4. What is the blue rectangle representing? Are the boundary conditions applied only to the lines or the faces?

**Reply:** Thank you for this comment. The blue rectangle represents the pollution source. The boundary conditions only applied to the lines because the river does not completely cut through the phreatic aquifer. As we mentioned in line 236 in the tracking version manuscript: “The bottom of the phreatic aquifer is an aquitard with overflow discharge, so it was set as the flux boundary”.

(23) Line 225: I guess planar source was indicated in Figure 4, while point source was not. Additionally, the authors should explain the rationale of simulating the two different sources, regarding the real-world processes they are representing.

**Reply:** Thank you for this comment. Yes, the planar source was indicated in Figure 4, while point source was not. The point source and planar source are intended as two representations of contaminant loading geometry in regional aquifers. The point source scenario represents localized releases such as leakage or spills from industrial facilities, tanks, pipelines, or localized injections and discharges, where the initial plume samples

only a small portion of the heterogeneous medium. The planar-source scenario represents an extended source zone that is effectively continuous along one horizontal direction and intersects multiple flow paths at early times rather than a single localized release. These two scenarios are used not to reproduce a specific historical release, but to quantify how source dimensions affect early time sampling of heterogeneity and the resulting uncertainty in plume metrics under basin-scale flow in this research. We have added some sentences to link these two idealized source geometries to the corresponding real world loading processes and to our study objective of isolating architecture-driven controls and uncertainty propagation at basin scale.

Revised information is in Line 268-271 in the tracking version manuscript: The point source represents localized releases (e.g., spills, leaks or point discharges), whereas the planar source represents an extended source zone that intersects multiple flow paths. These two scenarios are used to quantify how source dimensions control early time sampling of heterogeneity and uncertainty in plume metrics.

(24) Line 250: I would suggest reporting the error or correlation between model and observation. Additionally, in addition to the fitness between the averaged simulated water levels and measured ones, reporting the errors that reflect the fitness of simulated water levels for each realization or their statistical values (e.g., mean and standard deviation of the error of each realization) would better verify the robustness of the model results.

**Reply:** Thank you for this comment. Quantitative metrics are indeed necessary. We have added REMS to support the statement of good agreement.

Revised information is in Line 296-298 in the tracking version manuscript: The simulated water levels show good agreement with the observed values, closely following the 1:1 line, which proves. This visual consistency is supported by a relatively small error (RMSE = 0.507m), indicating that the water flow model ~~constructed in this study reliably captures~~reproduced the groundwater dynamics of the study area.

(25) Line 280: Add references to the Borden site results. Why does higher mean velocity accelerate stability? Was it due to stronger mechanical dispersion, or something else?

**Reply:** Thank you for this comment. We have added the reference in line 332 in the tracking version manuscript. The faster stabilization observed at Borden relative to our basin-scale case is interpreted as a sampling/ergodicity-timescale effect: stabilization requires that the plume traverse enough heterogeneity structure. A higher mean velocity increases the advective travel distance per unit time, so the plume samples more of the heterogeneous velocity field in the same elapsed time, and the approach toward quasi-ergodic behavior occurs sooner on the time axis.

(26) Line 305: The sensitivity and uncertainty methods were not introduced in section 2. Please provide the details about the specific methods and the analyzed factors and parameters.

**Reply:** Thank you for this comment. The sensitivity analysis in this study leans more towards scenario comparison. Therefore, we did not specifically introduce the sensitivity analysis method, but introduced the relevant content in Section 3.2 about the background and parameter settings. We also introduced the hydrogeological representativeness of different scenarios.

Revised information is in Line 367-373 in the tracking version manuscript: From a sedimentological perspective, in fluvial–alluvial systems the areal proportion of coarse deposits (e.g., gravel/sand bodies produced in paleochannel zones) versus floodplain fine deposits can vary substantially at the basin scale, reflecting the coupled effects of stream power and sediment supply, channel migration, floodplain aggradation and development (Bridge, 2009). Accordingly, Group A (near-equal proportions) represents a more mixed and interbedded architecture consistent with frequent channel migration and facies switching, whereas Group B (fine-dominated mixtures) represents a low-energy and/or distal floodplain setting where fine deposits are more prevalent and coarse bodies are more isolated.

Revised information is in Line 415-423 in the tracking version manuscript: As is well known,  $K$  varies widely and is subject to considerable estimation and upscaling uncertainty at field scales. To isolate the role of individual lithofacies, three model groups were designed in which only the mean  $K$  of a single lithofacies was increased threefold, while the other two remained unchanged. The choice to expand by three times also takes into account the uncertainty of  $K$  at a medium to high level. In Group 1, the mean  $K$  of GCS was raised to 138.06 m/d, ~~with MFS and SC fixed at 10.34 m/d and 0.12 m/d, respectively.~~ In Group 2, the mean  $K$  of MFS was increased to 31.02 m/d and in Group 3, the mean  $K$  of SC was increased to 0.36 m/d. In all cases, the variance of  $K$  was preserved, and the underlying heterogeneous sedimentary architecture remained unchanged. ~~Thus, all solute transport simulations were carried out within the same structural framework. Thus, any changes in dispersion can be attributed to altered inter-facies  $K$  contrast and the resulting redistribution of flow among facies.~~

(27) Figure 7 caption: Please clarify what each model was representing.

**Reply:** Thank you for this comment. Please see the reply of the question 26.

(28) Line 350: What does scale-dependent tread mean? How can realization-to-realization variability reveal the “scale-dependent tread”? What is the underlying rational and theoretical basis?

**Reply:** Thank you for this comment. In this manuscript, “scale-dependent” denotes how the magnitude of realization-to-realization variability (uncertainty) changes with the effective sampling scale of heterogeneity. Realization-to-realization variability reveals this trend because it provides a direct measure of how strongly plume metrics depend on the particular stochastic architecture realization. In our figures, this is quantified by the 10–90% confidence interval envelopes computed from 50 stochastic realizations. For example, under planar-source conditions the uncertainty envelopes are markedly narrower than under point-source conditions, reflecting a larger initial support area that samples more of the heterogeneous velocity field, like the source-area

enlargement effect, and thereby reduces realization dependence. This point is discussed in detail in the **Discussion** section.

(29) Line 355: It seems Scale II was used for these analyses. Can you comment on whether the impact of varying  $K$  values on flow and solute transport will remain similar between Scale I and Scale II models?

**Reply:** Thank you for this comment. In the uncertainty/scenario analyses (Section 3.2), we intentionally used Scale II models under planar-source release to ensure stable and consistent comparisons and to minimize realization noise; this is stated in the first paragraph of Section 3.2. Regarding whether the effects of changing  $K$  are similar in Scale I and Scale II representations: our results indicate that, for basin-scale transport metrics, the qualitative response to  $K$  perturbations is expected to be similar in the multiscale and Scale II models, because the dominant controls are the conductivity contrasts and connectivity of the larger-scale architectural elements. This is supported by the explicit cross-scale comparison in Figure 6, where the multiscale model and the Scale II model show close agreement in plume migration and macrodispersivity, particularly under planar-source release, demonstrating that basin-scale dispersion characteristics are effectively captured once the geometry of the controlling lithofacies at larger scales is represented.

(30) Line 415: What is the reason for this difference? What is the implication for characterizations and simulations of contamination transport at different sites? I will probably talk about the key finding of these studies and then make the comparisons with the Borden site in the second last paragraph of this section given that there were several comparisons (similarity vs difference).

**Reply:** Thank you for this comment. We have reorganized the content of the **Discussion** section and then conducted a comprehensive comparison and analysis.



(31) Line numbers should be appended to each line for the reviewer to pinpoint their comments.

**Reply:** Thanks. We use the journal's standard submission template.
